# Supplementary figures and images for: Accelerating and de‐risking CMC development with transposon‐derived manufacturing cell lines
Source: PubMed Central journal article supplement — Biotechnol Bioeng. 2021 Apr 2;118(6):2301–11. doi: 10.1002/bit.27742 (PMC8252637; doi:10.1002/bit.27742), 2021-04-02

# PDO

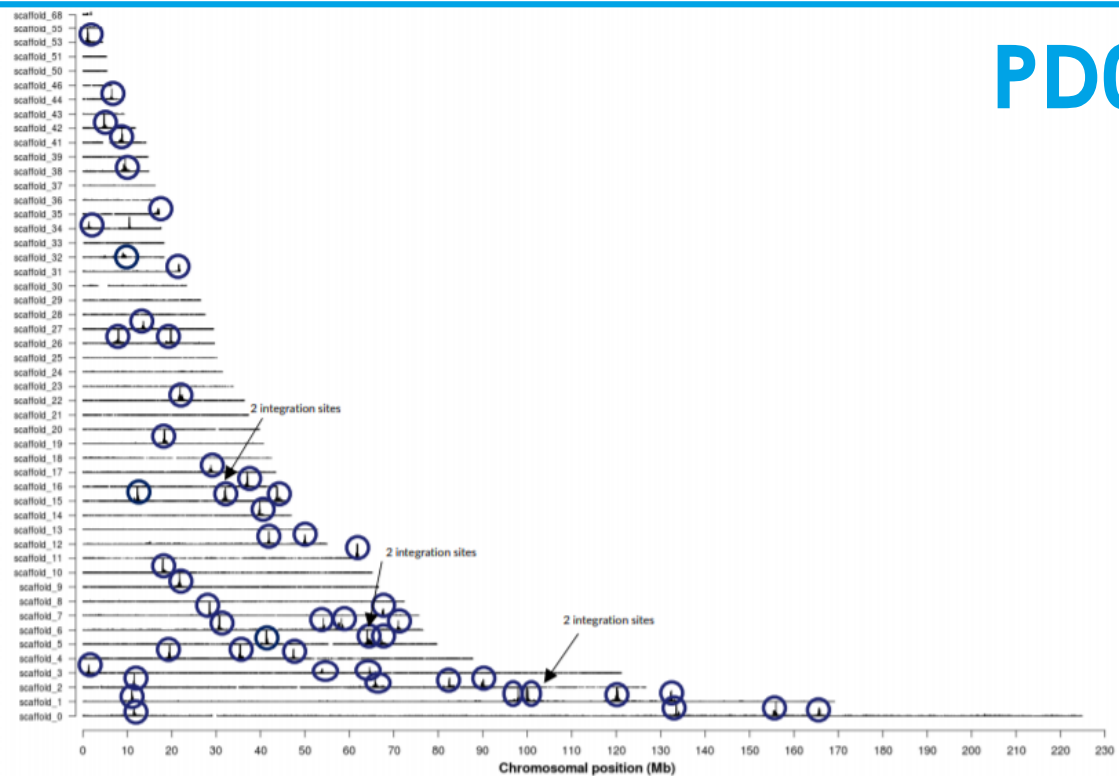

# PD90

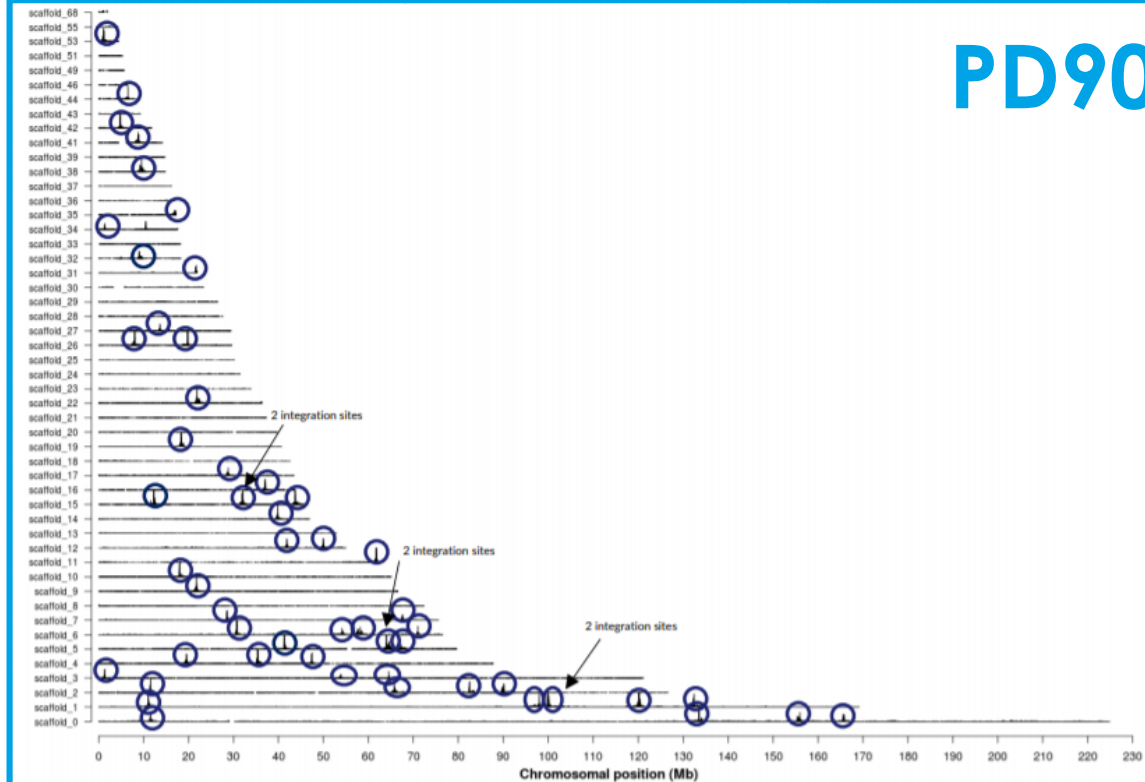

Supplement: BIT-118-2301-s001.pdf [file BIT-118-2301-s001.pdf]
